# Supplementary material for: Accuracy of routinely-collected healthcare data for identifying motor neurone disease cases: A systematic review
Source: PubMed Central journal article supplement (PMC5330471; doi:10.1371/journal.pone.0172639), 2017-02-28
Supplement: pone.0172639.s003.pdf [file pone.0172639.s003.pdf]

**S2 Table. QUADAS-2 results**

| First author    | Year | Risk of bias      |            |                    |                 | Applicability concerns |            |                    |
|-----------------|------|-------------------|------------|--------------------|-----------------|------------------------|------------|--------------------|
|                 |      | Patient selection | Index test | Reference standard | Flow and timing | Patient selection      | Index test | Reference standard |
| Alonso          | 2009 | ✓                 | ?          | ✓                  | ✓               | ✓                      | ✓          | ✓                  |
| Beghi           | 2001 | ✓                 | ✓          | ?                  | ?               | ✓                      | ✓          | ?                  |
| Chancellor      | 1993 | ✓                 | ✓          | ?                  | ?               | ✓                      | ✓          | ✓                  |
| Chió            | 1992 | ?                 | ✓          | ✓                  | ✓               | ✓                      | ?          | ✓                  |
| Chió            | 2002 | ✓                 | ✓          | ✓                  | ?               | ✓                      | ✓          | ✓                  |
| Doyle           | 2012 | ?                 | ✓          | ✓                  | ✓               | ✓                      | ✓          | ✓                  |
| Drigo           | 2013 | ✓                 | ✓          | ?                  | ✓               | ?                      | ✓          | ✓                  |
| Fong            | 2005 | ?                 | ✓          | ✓                  | ?               | ✓                      | ?          | ✓                  |
| Kioumourtzoglou | 2015 | ?                 | ✓          | ?                  | ?               | ?                      | ?          | ✓                  |
| Pisa            | 2009 | ?                 | ✓          | ✓                  | ✓               | ✓                      | ✓          | ✓                  |
| Stickler        | 2011 | ✓                 | ✓          | ✓                  | ✓               | ✓                      | ✓          | ✓                  |
| Stickler        | 2012 | ✓                 | ✓          | ✓                  | ?               | ✓                      | ✓          | ✓                  |
| Yeo             | 2010 | ✓                 | ?          | ?                  | ✓               | ✓                      | ✓          | ✓                  |
