# Supplementary material for: Accuracy of routinely-collected healthcare data for identifying motor neurone disease cases: A systematic review
Source: PubMed Central journal article supplement (PMC5330471; doi:10.1371/journal.pone.0172639), 2017-02-28
Supplement: pone.0172639.s005.pdf [file pone.0172639.s005.pdf]

## **S2 File. Members of the UK Biobank Follow-up and Outcomes Working Group and Neurodegenerative Outcomes Advisory Group**

### **UK Biobank Follow-up and Outcomes Working Group**

John Danesh, Cambridge University  
Naomi Allen, UK Biobank, Oxford University  
Mark Atkinson, Swansea University  
Ekaterini Blaveri, Cancer Research UK  
Rachael Brannan, National Cancer Intelligence Network  
Carol Brayne, Cambridge University  
Sinead Brophy, Swansea University  
Nish Chaturvedi, University College London  
Rory Collins, UK Biobank, Oxford University  
Simon deLusignan, Surrey University  
Spiros Denaxas, University College London  
Parul Desai, Moorfields Eye Hospital  
Sophie Eastwood, University College London  
John Gallacher, Cardiff University  
Harry Hemingway, University College London  
Matthew Hotopf, Kings College London  
Martin Landray, Oxford University  
Ronan Lyons, Swansea University  
Mark McGilchrist, Dundee University  
Henrik Moller, Kings College London  
Terence O'Neil, Manchester University  
Mike Pringle, Nottingham University  
Tim Sprosen, Oxford University  
David Strachan, St George's University, London  
Cathie Sudlow, UK Biobank, Edinburgh University  
Frank Sullivan, Dundee University  
Rebecca Woodfield, Edinburgh University  
Qiuli Zhang, UK Biobank, Edinburgh University  
Robin Flaig, UK Biobank, Edinburgh University

### **UK Biobank Neurodegenerative Outcomes Working Group**

Naomi Allen, UK Biobank, Oxford University  
Roger Barker, Cambridge University  
Yoav Ben-Shlomo, University of Bristol  
Carol Brayne, Cambridge University  
Andrew Bucknor, Oxford University  
Camille Carroll, Plymouth University  
Siddharthan Chandran, University of Edinburgh  
Carl Counsell, University of Aberdeen  
John Danesh, Cambridge University  
Daniel Davis, University of Edinburgh  
Katrina Davis, King's College London  
Mike Denis, Oxford University  
Mick Dennis, Swansea University  
Pat Doyle, London School of Hygiene and Tropical Medicine

Nick Fox, University College London  
John Gallacher, Cardiff University  
Valentina Gallo, Queen Mary University of London  
Jane Green, Oxford University  
Matthew Hotopf, King's College London  
Simon Lovestone, Oxford University  
Ronan Lyons, Swansea University  
Ian McKeith, Newcastle University  
Craig Newman, Plymouth University  
John O'Brian, Cambridge University  
Suvankar Pal, University of Edinburgh  
Sarah Pendlebury, Oxford University  
Craig Ritchie, University of Edinburgh  
Martin Rossor, University College London  
John Starr, University of Edinburgh  
Blossom Stephan, Newcastle University  
Rob Stewart, King's College London  
Cathie Sudlow, UK Biobank, University of Edinburgh  
Robert Swingle, University of Edinburgh  
Will Whiteley, University of Edinburgh  
Tim Wilkinson, University of Edinburgh
